# Supplementary material for: Reduced health-related quality of life in children born extremely preterm in 2006 compared with 1995: the EPICure Studies
Source: PubMed Central journal article supplement (PMC9209681; doi:10.1136/archdischild-2021-322888), 2021-10-25

**Figure S1 A flow chart of the two samples of extremely preterm children at 11 years of age born in England in 1995 and 2006.**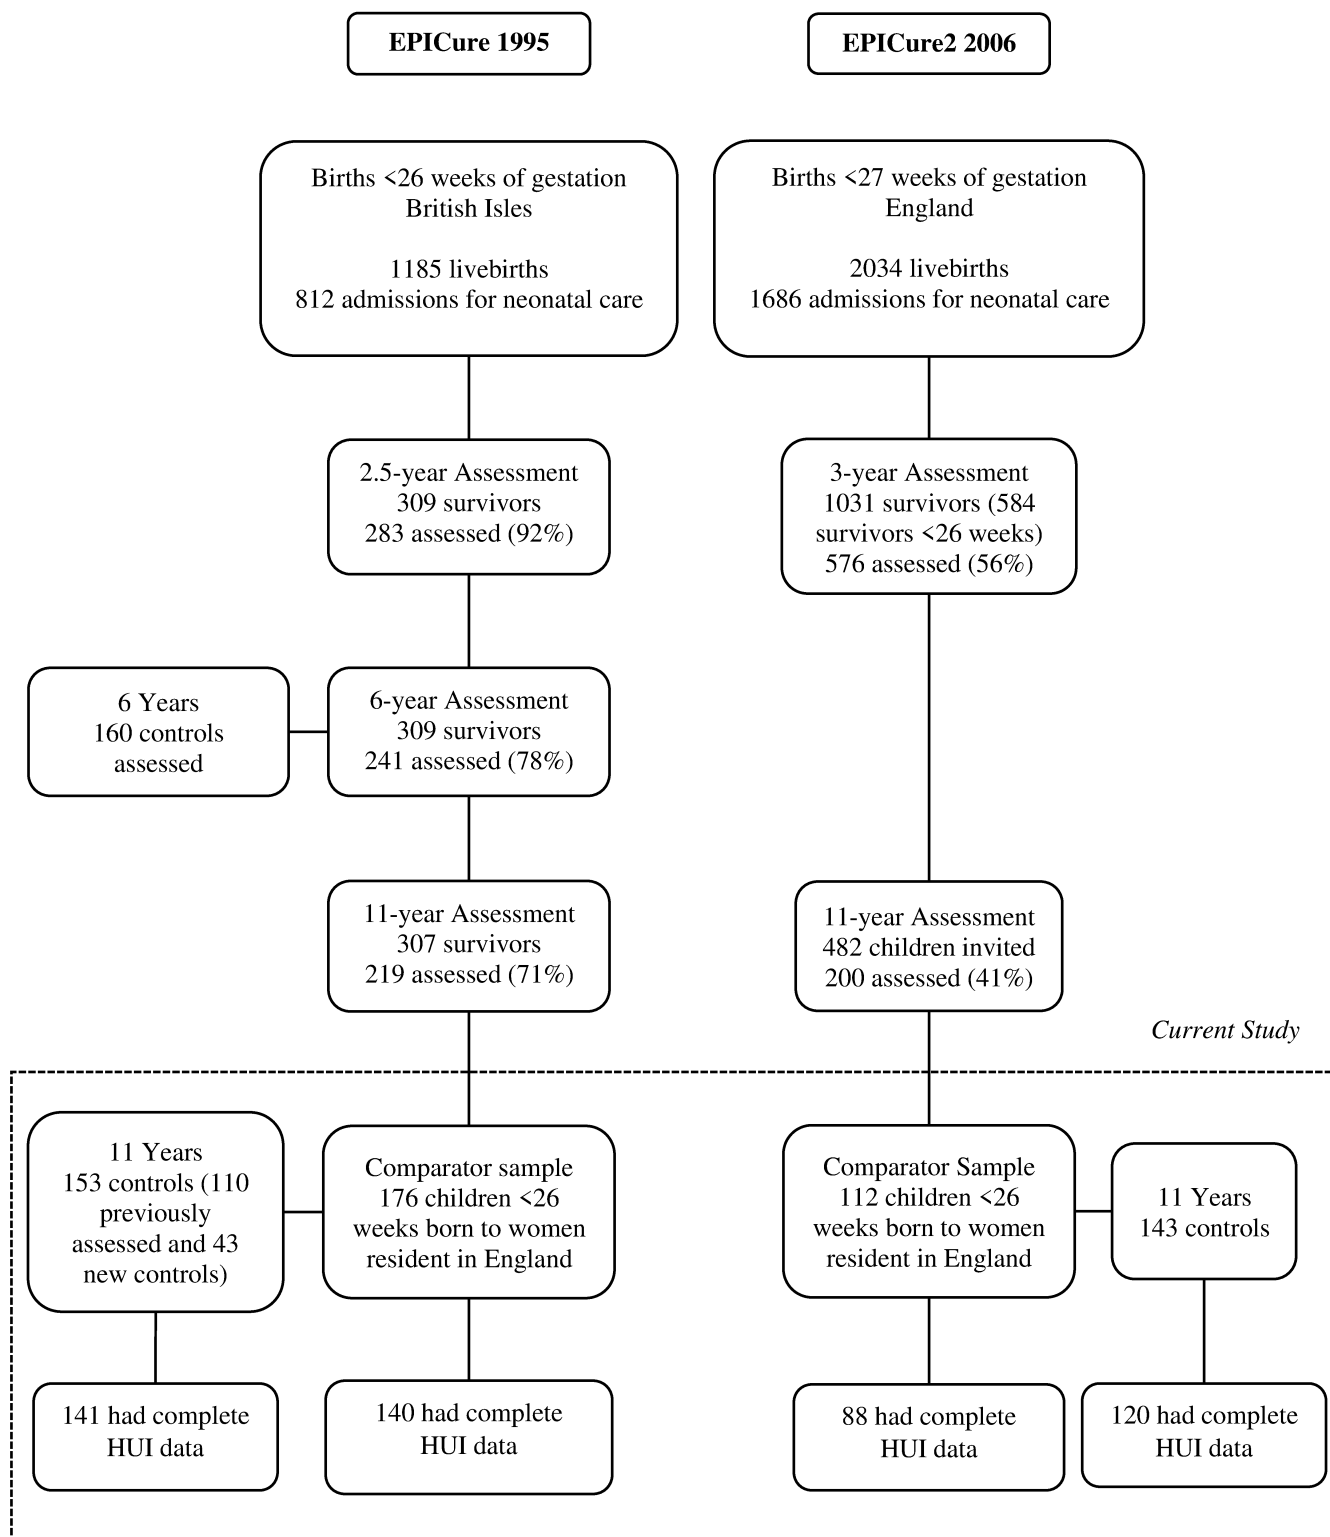

Supplement: fetalneonatal-2021-322888supp001.pdf [file fetalneonatal-2021-322888supp001.pdf]
